# Supplementary material
Source: PubMed Central journal article supplement (PMC2533373)
Supplement: 11606_2008_739_MOESM1_ESM.pdf [file 11606_2008_739_MOESM1_ESM.pdf]

# CHORD STUDY QUESTIONNAIRE

Site: *(Please check)*

3701 Market Street

City Health Clinic

Philadelphia Veterans Hospital

Presbyterian Hospital Clinic

## PART 1. Your opinions

Some health plans have considered the idea of paying patients who improve their health behaviors—for example, if smokers quit smoking, or if overweight patients lose weight. We are interested in your feelings about whether such programs are a good idea. In the following section, please rate each idea between 1 and 5. If you think an idea is excellent, give it a rating of 5. If you think an idea is bad, give it a rating of 1. If you think an idea is in between, give it a rating somewhere in between.

| PLEASE TELL US YOUR OPINION OF EACH IDEA |                                                                                      | Bad idea |   | Neutral |   | Excellent idea |
|------------------------------------------|--------------------------------------------------------------------------------------|----------|---|---------|---|----------------|
| 1                                        | Paying patients to quit smoking                                                      | 1        | 2 | 3       | 4 | 5              |
| 2                                        | Paying overweight patients to lose weight                                            | 1        | 2 | 3       | 4 | 5              |
| 3                                        | Paying patients with diabetes if their blood sugar is well controlled                | 1        | 2 | 3       | 4 | 5              |
| 4                                        | Paying patients with high cholesterol if their cholesterol is well controlled        | 1        | 2 | 3       | 4 | 5              |
| 5                                        | Paying patients with high blood pressure if their blood pressure is well controlled  | 1        | 2 | 3       | 4 | 5              |
| 6                                        | Charging non-smokers less for their health insurance                                 | 1        | 2 | 3       | 4 | 5              |
| 7                                        | Charging smokers more for their health insurance                                     | 1        | 2 | 3       | 4 | 5              |
| 8                                        | Charging people who are not overweight less for their health insurance               | 1        | 2 | 3       | 4 | 5              |
| 9                                        | Charging people who are overweight more for their health insurance                   | 1        | 2 | 3       | 4 | 5              |
| 11                                       | My insurance company should offer programs like this to reward healthy behavior      | 1        | 2 | 3       | 4 | 5              |
| 12                                       | The VA should offer programs like this to reward healthy behavior (VA patients only) | 1        | 2 | 3       | 4 | 5              |

In the following section, please rate each item between 'strongly disagree' to 'strongly agree.' If you strongly agree with an item, rate it 'strongly agree.' If you strongly disagree, rate it 'strongly disagree.' If your opinions are in between, rate it somewhere in between.

| PLEASE TELL US YOUR OPINION OF EACH IDEA |                                                                                                                                      | Strongly Disagree | Disagree | Neither agree nor disagree | Agree | Strongly Agree |
|------------------------------------------|--------------------------------------------------------------------------------------------------------------------------------------|-------------------|----------|----------------------------|-------|----------------|
| 1                                        | I think paying people to lose weight just rewards people who are overweight.                                                         |                   |          |                            |       |                |
| 2                                        | I think paying people to lose weight would be effective at helping people lose weight                                                |                   |          |                            |       |                |
| 3                                        | Paying smokers to quit will help lower health care costs for everybody                                                               |                   |          |                            |       |                |
| 4                                        | Paying smokers to quit isn't fair to the nonsmokers.                                                                                 |                   |          |                            |       |                |
| 5                                        | People should not be paid to do things that they should do anyway, like quitting smoking or taking care of their high blood pressure |                   |          |                            |       |                |
| 6                                        | Paying people to quit smoking may be one of the only effective ways to increase quit rates                                           |                   |          |                            |       |                |
| 7                                        | People who have diabetes have mostly themselves to blame for having diabetes                                                         |                   |          |                            |       |                |
| 8                                        | People who have high blood pressure have mostly themselves to blame for having high blood pressure                                   |                   |          |                            |       |                |
| 9                                        | People who are overweight have mostly themselves to blame for being overweight                                                       |                   |          |                            |       |                |
| 10                                       | People who have high cholesterol have mostly themselves to blame for having high cholesterol                                         |                   |          |                            |       |                |
| 11                                       | People who smoke have mostly themselves to blame for smoking                                                                         |                   |          |                            |       |                |

12. How much money should we pay smokers to quit smoking?

1  \$0   2  \$50   3  \$100   4  \$250   5  \$500   6  \$1,000   7  \$1,500   8  more than \$1,500

13. How much money should we pay overweight people to lose weight so that they are no longer overweight?

1  \$0   2  \$50   3  \$100   4  \$250   5  \$500   6  \$1,000   7  \$1,500   8  more than \$1,500

14. How much money should we pay people with diabetes to control their blood sugar so that it is well controlled?

1  \$0   2  \$50   3  \$100   4  \$250   5  \$500   6  \$1,000   7  \$1,500   8  more than \$1,500

15. How much money should we pay people to get their blood pressure well controlled?

1  \$0   2  \$50   3  \$100   4  \$250   5  \$500   6  \$1,000   7  \$1,500   8  more than \$1,500

16. How much money should we pay people with high cholesterol to have well-controlled cholesterol?

- 1  \$0   2  \$50   3  \$100   4  \$250   5  \$500   6  \$1,000   7  \$1,500   8  more than \$1,500

### PART 3: DEMOGRAPHICS

**DE1. What sex are you?** 0  female 1  male

**DE2. What year were you born?**    years old

**DE3. What is the highest grade or year of school you have completed?**

- 1  Never attended school or only attended kindergarten  
2  Grades 1 through 8 (Elementary)  
3  Grades 9 through 11 (Some high school)  
4  Grade 12 or GED (High school graduate)  
5  College 1 year to 3 years (Some college or technical school)  
6  College 4 years or more (College graduate)  
7  Some graduate school or advanced degree

What is your approximate annual income? \_\_\_\_\_

- |                                                         |                                                         |
|---------------------------------------------------------|---------------------------------------------------------|
| 0 <input type="checkbox"/> less than \$10,000           | 1 <input type="checkbox"/> between \$10,000 & \$15,000  |
| 2 <input type="checkbox"/> between \$15,000 & \$20,000  | 3 <input type="checkbox"/> between \$20,000 & \$25,000  |
| 4 <input type="checkbox"/> between \$25,000 & \$30,000  | 5 <input type="checkbox"/> between \$30,000 & \$35,000  |
| 6 <input type="checkbox"/> between \$35,000 & \$40,000  | 7 <input type="checkbox"/> between \$40,000 & \$45,000  |
| 8 <input type="checkbox"/> between \$45,000 & \$50,000  | 9 <input type="checkbox"/> between \$50,000 & \$60,000  |
| 10 <input type="checkbox"/> between \$60,000 & \$75,000 | 11 <input type="checkbox"/> between \$75,000 & \$90,000 |
| 12 <input type="checkbox"/> greater than \$90,000       | 99 <input type="checkbox"/> Don't know                  |

How many people does this income support? \_\_\_\_\_

| <b>Has a doctor or other health care professional ever told you that you have any of the following?:</b> |                               |                                |
|----------------------------------------------------------------------------------------------------------|-------------------------------|--------------------------------|
| H1. High blood pressure?                                                                                 | 0 <input type="checkbox"/> No | 1 <input type="checkbox"/> Yes |
| H2. High Cholesterol?                                                                                    | 0 <input type="checkbox"/> No | 1 <input type="checkbox"/> Yes |
| H3. Diabetes?                                                                                            | 0 <input type="checkbox"/> No | 1 <input type="checkbox"/> Yes |
| H4. Obesity (being overweight)?                                                                          | 0 <input type="checkbox"/> No | 1 <input type="checkbox"/> Yes |
| H5. Do you smoke?                                                                                        | 0 <input type="checkbox"/> No | 1 <input type="checkbox"/> Yes |
